# Supplementary material
Source: publisher figshare collection journal article supplement (https://acs.figshare.com/ndownloader/files/4456669)
Supplement: Supplementary file 1 [file 4456669]

**SUPPORTING INFORMATION:**

# Detection of Spin Polarized Carrier in Silicon Nanowire with Single Crystal MnSi as Magnetic Contacts

*Yung-Chen Lin,<sup>†</sup> Yu Chen,<sup>†</sup> Alexandros Shailos,<sup>‡</sup> and Yu Huang<sup>\*,†,‡</sup>*

<sup>†</sup>Department of Materials Science and Engineering and <sup>‡</sup>California Nano Systems

Institute, University of California, Los Angeles, Los Angeles, California

yhuang@seas.ucla.edu

Figure S1 shows a high-resolution TEM image of MnSi/Si interface. The lattice mismatch between Si( $3\bar{1}\bar{1}$ ) and MnSi( $1\bar{2}0$ ) is about 24.5%. An extra Si semi-plane can be observed every four planes, which is believed to release stress built-up in the crystal, leading to a coherent interface between MnSi and Si.

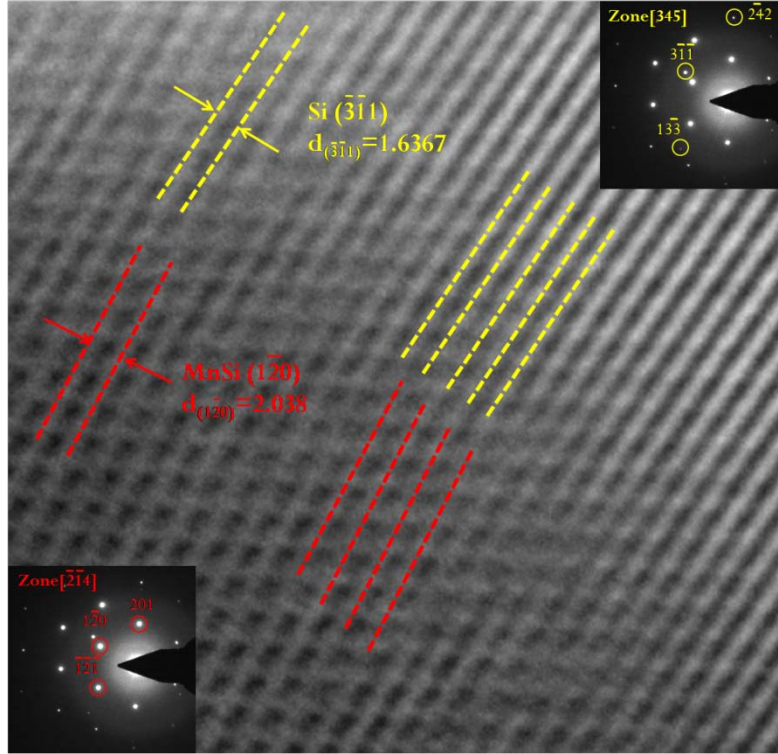

Figure S1. High-resolution TEM image of MnSi/ Si interface. Insets are the diffraction patterns of MnSi $[\bar{2}\bar{1}4]$  and Si $[345]$  zone axis. Measured lattice mismatch at interface is ~24.5 % which is consistent with one-planar spacing between MnSi $(1\bar{2}0)$  and Si $(3\bar{1}\bar{1})$ . There is an extra Si semi-plane every four planes.

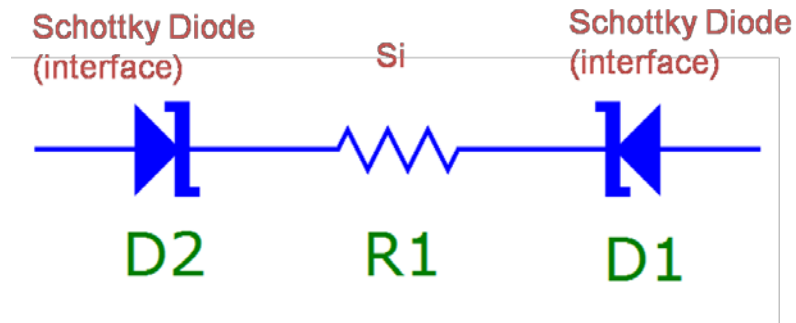

Figure S2. The equivalent circuit of MnSi/Si/MnSi heterostructure. The heterostructure can be treated as two Schottky diodes (interface) connected back to back and in series

with a resistance (silicon region). To determine the Schottky barrier height (SBH) of the MnSi/Si interface, a model of two back-to-back Schottky contacts have been proposed to address the nonlinear  $I$ - $V$ - $T$  curves of semiconductor nanowire junction. Regarding thermionic emission behavior, the  $I$ - $V$ - $T$  relation of a reverse-biased Schottky diode can be described by the following equation:

$$I = AA^{**}T^2 \exp\left(-\frac{q\phi_B}{k_B T}\right)$$

where  $A$  is the contact area,  $A^{**}$  is the effective Richardson constant, and  $\phi_B$  the effective Schottky barrier height.  $\phi_B$  can be obtained from the slope of Figure 4d which is an Arrhenius plot of  $\ln(I/T^2)$  versus  $1/T$  in the low bias regime. Slope of Arrhenius plot is equal to  $-q\phi_B/k_B$ . Therefore, the effective Schottky barrier height  $\phi_B$  can be extracted. This holds only for high temperatures at which  $A^{**}$  and  $\phi_B$  are temperature independent.<sup>1,2</sup>

#### Reference:

1. Nam, C. Y.; Tham, D.; Fischer, J. E. *Nano Lett.* **2005**, 5, 2029-2033.
2. Sze, S. M. *Physics of Semiconductor Devices*; Wiley: New York, 1981.
